# Supplementary material
Source: PubMed Central journal article supplement (PMC2786792)
Supplement: JCI39054sd.pdf [file JCI39054sd.pdf]

**Overexpression of MAPK Phosphatase-1 in obesity impairs PGC-1 $\alpha$ -mediated regulation of myofiber type composition**

Rachel J. Roth<sup>1</sup>, Annie M. Le<sup>1</sup>, Lei Zhang<sup>1</sup>, Mario Kahn<sup>2</sup>, Varman T. Samuel<sup>2,3</sup>, Gerald I. Shulman<sup>2,4</sup> and Anton M. Bennett<sup>1†</sup>

**Figure S1.** Growth curve of chow-fed C57BL6/J *mkp-1<sup>-/-</sup>* and C57BL6/J *mkp-1<sup>+/+</sup>* mice.mice.

(A) 129/J *mkp-1<sup>-/-</sup>* mice were backcrossed to wild type C57BL6/J mice for eight generations. At weaning, backcrossed *mkp-1<sup>+/+</sup>* (open circles) and *mkp-1<sup>-/-</sup>* (closed circles) mice were placed on a chow diet and weights were monitored weekly for 20 weeks. Data represent mean  $\pm$  SEM (n= 3-16) for each time point.

**Figure S2.** Fatty acids do not induce cytotoxic effects in myoblasts and are increased in skeletal muscle after HFD.

(A) C2C12 myoblasts were starved overnight, and stimulated with 400  $\mu$ M palmitate (C16:0), 100  $\mu$ M palmitoleate (C16:1n7), a mixture of the two, 500  $\mu$ M stearate (C18:0), or 100  $\mu$ M oleate (C18:1n9) for 30 minutes. RNA was harvested, and MKP-1 mRNA levels were measured by RT-qPCR and normalized to 18S. Data represent the mean  $\pm$  SEM (n=3-4, \* ;  $P<0.05$ ). (B) C2C12 myoblasts were starved overnight, and stimulated as in (A). Cells were stained with trypan blue and the percentage of trypan blue positive cells was assessed (n=5, \* ;  $P<0.05$ ). (C) Plantaris muscle was isolated from chow or

HFD-fed *mkp-1<sup>+/+</sup>* mice, lipid metabolites were extracted, and LC/MS/MS analysis was performed. Data represent the mean  $\pm$  SEM of total acyl-CoA content as normalized to tissue weight (n=4-5, \*,  $P < 0.05$ ) (D) Plantaris muscle was isolated and lipid metabolites were analyzed as in (C). Data represent the mean  $\pm$  SEM of lipid metabolites as normalized to tissue weight (n=4-5, \*\*,  $P < 0.005$ ).

**Figure S3.** Controls for skeletal muscle nuclear extracts and PGC-1 $\alpha$  immunoblots.

(A) Cytosolic and nuclear extracts were prepared from tibialis anterior muscle and immunoblotted for Na/K ATPase or Lamin- $\beta$ 1 as controls for the cytosolic and nuclear fractions, respectively. (B) Left panel: nuclear extracts, immunodepletions for pS265 or total PGC-1 $\alpha$ , and positive control (C2C12 myoblasts transfected with PGC-1 $\alpha$  and treated for 4 hours with LPS) were immunoblotted for pS265 PGC-1 $\alpha$ . Right panel: nuclear extracts, pS265 and total PGC-1 $\alpha$  immunodepletions, and positive control were immunoblotted for total PGC-1 $\alpha$ . Endogenous PGC-1 $\alpha$  can be seen in the dark exposures in nuclear extract and positive control lanes at ~115 kDa.

**A.**

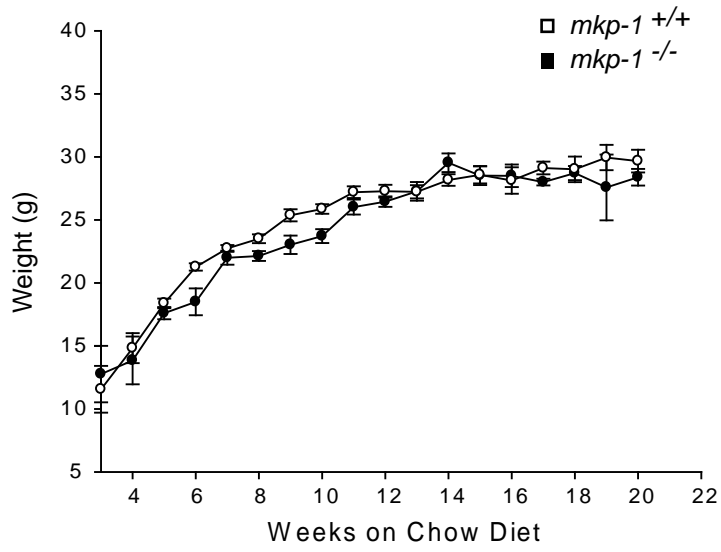

**Figure S1**

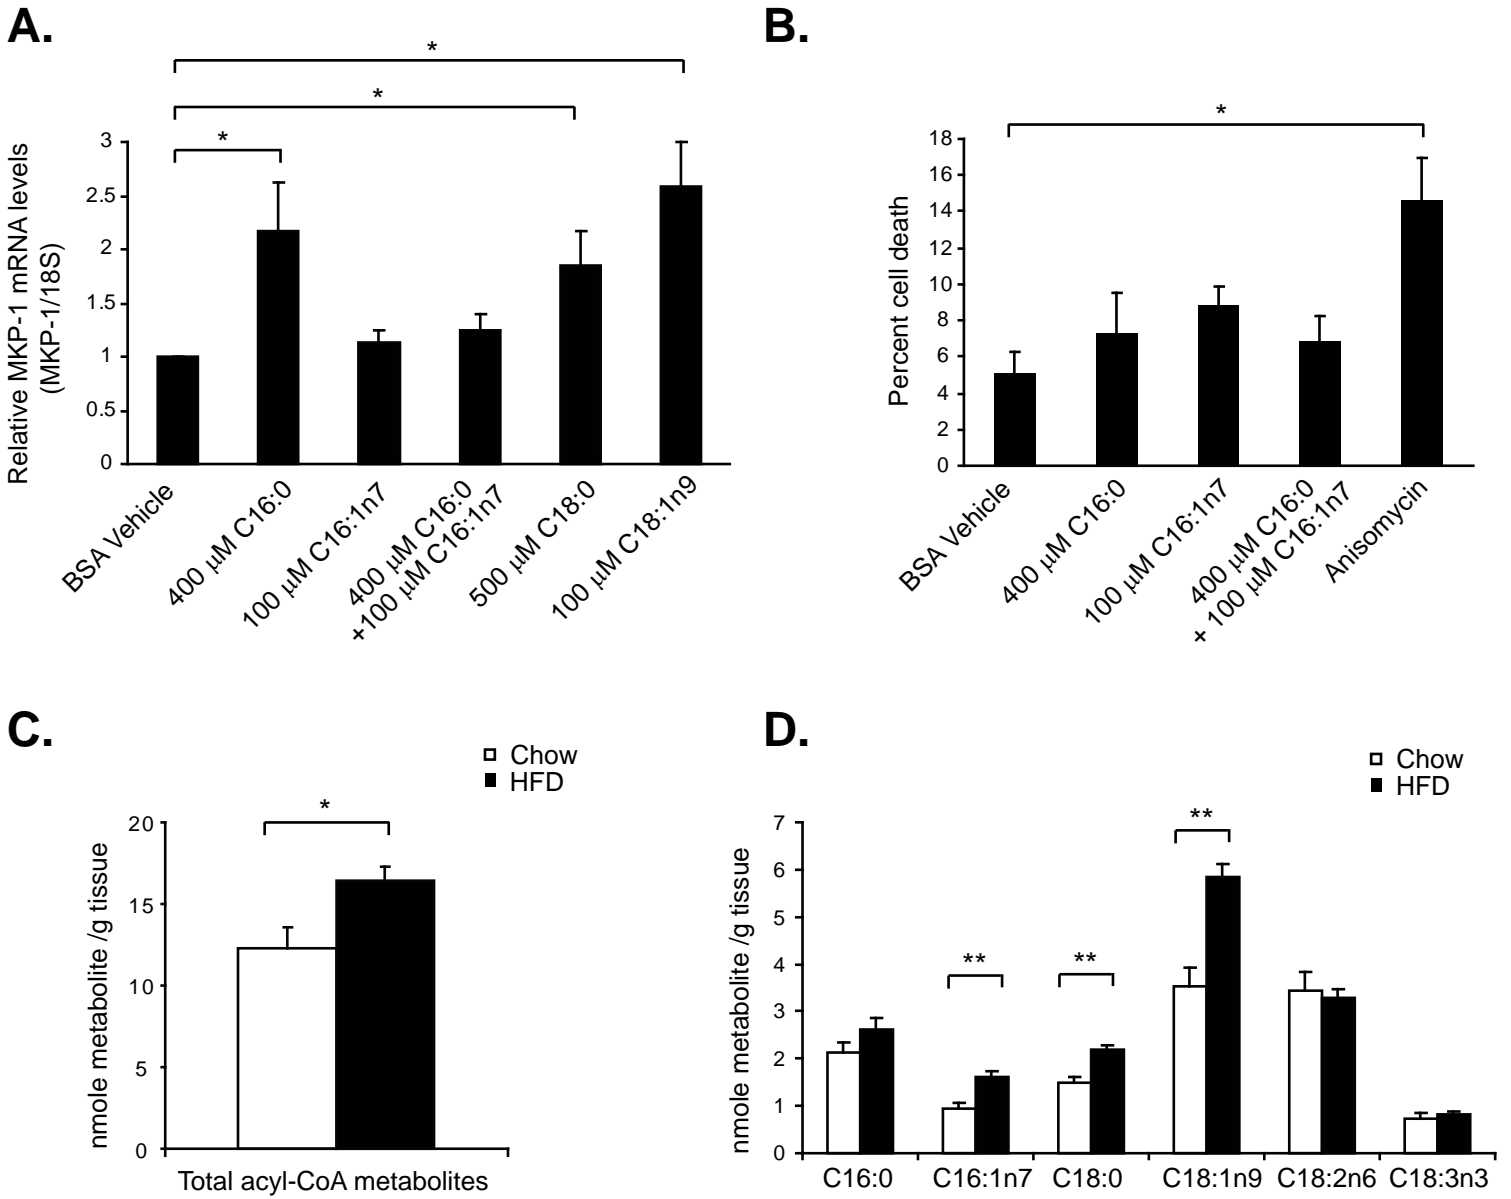

Figure S2

**A.**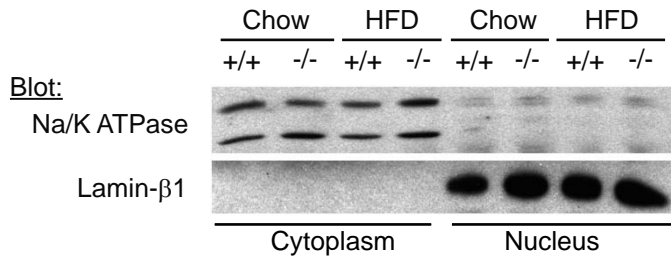**B.**

Blot: pS265 PGC-1α

Blot: PGC-1α

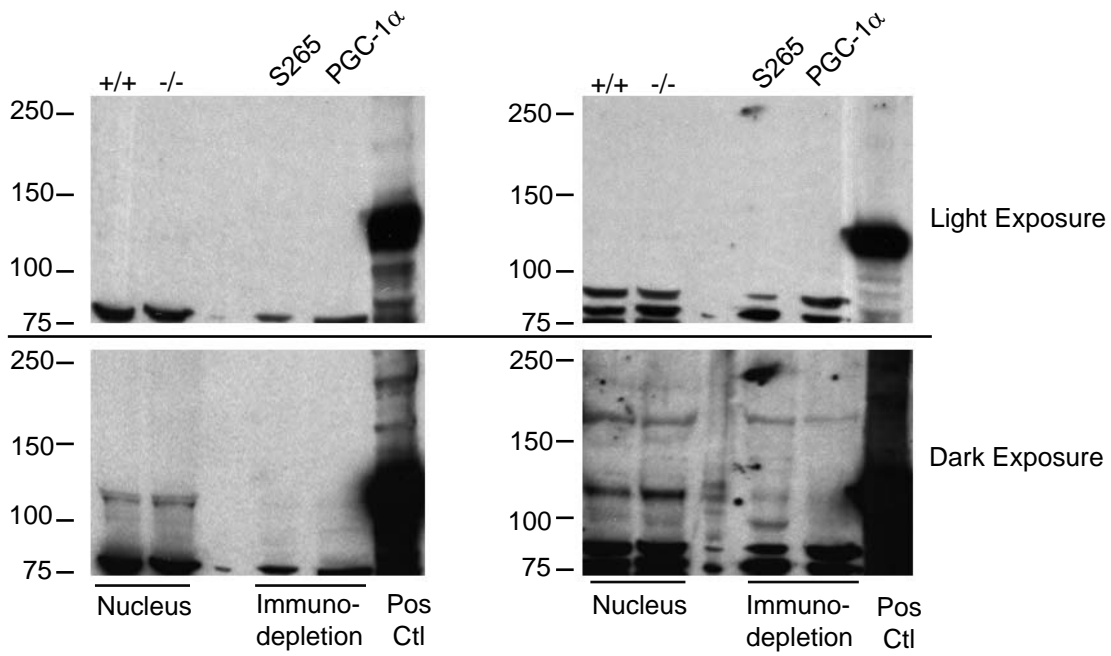**Figure S3**
